# Supplementary material
Source: PubMed Central journal article supplement (PMC4350535)
Supplement: SD2.pdf [file SD2.pdf]

SUPPLEMENTAL TABLE 1

Microneutralization titers of participants with evidence of anti-dengue virus (anti-DENV) immunoglobulin G (IgG) seroconversion by a four-fold rise in IgG titers or a negative anti-DENV IgG to a positive anti-DENV IgG

| S1 IgG titer | S2 IgG titer | S1 MNT titer |        |          |          | Dominant serotype S1 | S2 MNT titer |          |          |          | Dominant serotype S2 | Seroconversion by MNT | Monotypic |
|--------------|--------------|--------------|--------|----------|----------|----------------------|--------------|----------|----------|----------|----------------------|-----------------------|-----------|
|              |              | DENV-1       | DENV-2 | DENV-3   | DENV-4   |                      | DENV-1       | DENV-2   | DENV-3   | DENV-4   |                      |                       |           |
| 80           | 80           | 640          | 160    | < 80     | < 80     | DENV-1               | > 2,560*     | 160      | < 80     | < 80     | DENV-1               | DENV-1                | No        |
| 40,960       | 40,960       | 160          | 640    | 640      | > 2,560* | DENV-4               | 640          | > 2,560* | > 2,560* | > 2,560* | None                 | Secondary             | No        |
| 10,240       | 10,240       | 40           | 40     | > 640*   | 80       | DENV-3               | 40           | 40       | > 640*   | 640      | DENV-3               | DENV-4                | No        |
| 10,240       | 2,560        | 160          | 160    | 320      | 80       | None                 | 80           | 80       | 1,280    | < 80     | DENV-3               | DENV-3                | No        |
| 160          | 160          | < 20         | < 20   | < 20     | < 20     | Negative             | < 80         | < 80     | 80       | < 80     | DENV-3               | DENV-3                | DENV-3    |
| 2,560        | 2,560        | < 80         | < 80   | 320      | < 80     | DENV-3               | < 80         | < 80     | 1,280    | < 80     | DENV-3               | DENV-3                | DENV-3    |
| 160          | 160          | < 80         | < 80   | < 80     | < 80     | Negative             | 80           | 640      | < 80     | < 80     | DENV-2               | DENV-2                | No        |
| 10,240       | 10,240       | < 80         | < 80   | 1,280    | 80       | DENV-3               | < 80         | 80       | > 2,560* | 80       | DENV-3               | DENV-3                | No        |
| 10,240       | 10,240       | < 80         | < 80   | 160      | 80       | DENV-3               | 80           | 80       | > 2,560* | < 80     | DENV-3               | DENV-3                | No        |
| 2,560        | 2,560        | 1,280        | < 80   | 320      | < 80     | DENV-1               | > 2,560*     | 80       | 320      | 80       | DENV-1               | DENV-1                | No        |
| 160          | 655,360      | < 80         | < 80   | 80       | < 80     | DENV-3               | 320          | 160      | > 2,560* | 320      | DENV-3               | DENV-3                | No        |
| 0            | 2,560        | 160          | < 80   | < 80     | < 80     | DENV-1               | 160          | 640      | < 80     | < 80     | DENV-2               | DENV-2                | No        |
| 0            | 2,560        | < 80         | < 80   | < 80     | < 80     | Negative             | < 80         | < 80     | 160      | < 80     | DENV-3               | DENV-3                | DENV-3    |
| 10,240       | 163,840      | < 80         | < 80   | > 2,560* | < 80     | DENV-3               | 320          | 1,280    | > 2,560* | > 2,560* | None                 | Secondary             | No        |
| 40,960       | 40,960       | 80           | 640    | 640      | 640      | None                 | < 80         | 640      | > 2,560* | 640      | DENV-3               | DENV-3                | No        |
| 10,240       | 10,240       | < 80         | < 80   | 80       | 320      | DENV-4               | 80           | 160      | 160      | 1,280    | DENV-4               | DENV-4                | No        |
| 10,240       | 40,960       | 80           | 1,280  | 1,280    | > 2,560* | DENV-4               | 1,280        | > 2,560* | > 2,560* | > 2,560* | None                 | Secondary             | No        |
| 0            | 2,560        | < 80         | < 80   | < 80     | < 80     | Negative             | < 80         | > 2,560* | < 80     | < 80     | DENV-2               | DENV-2                | DENV-2    |
| 2,560        | 2,560        | < 80         | 1,280  | < 80     | < 80     | DENV-2               | < 80         | > 2,560* | < 80     | < 80     | DENV-2               | DENV-2                | DENV-2    |

\* A specimen titer above the last dilution of serum tested is indicated by > 2,560 or > 640. MNT = microneutralization test.
